1 **Curcumin and turmeric extract inhibit SARS-CoV-2 pseudovirus cell entry and spike-**  
2 **mediated cell fusion**

3

4 Authors: Endah Puji Septisetyani<sup>a\*</sup>, Dinda Lestari<sup>a,b</sup>, Komang Alit Paramitasari<sup>a</sup>, Pekik Wiji  
5 Prasetyaningrum<sup>a</sup>, Ria Fajarwati Kastian<sup>a</sup>, Khairul Anam<sup>c</sup>, Adi Santoso<sup>a</sup>, Kartini Eriani<sup>b</sup>

6

7 Authors Affiliation:

8 <sup>a</sup>Mammalian Cell Engineering Research Group, Research Center for Genetic Engineering,  
9 National Research and Innovation Agency (BRIN), Jl. Raya Bogor KM. 46, Cibinong,  
10 Bogor, West Java, 16911, Indonesia

11 <sup>b</sup>Universitas Syiah Kuala, Faculty of Mathematics and Natural Sciences, Department of  
12 Biology, Banda Aceh, Indonesia

13 <sup>c</sup>Research Center for Applied Microbiology, National Research and Innovation Agency  
14 (BRIN), Jl. Raya Bogor KM. 46, Cibinong, Bogor, West Java, 16911, Indonesia

15

16 \*Corresponding Author:

17 Name : Dr. Endah Puji Septisetyani, M.Sc.

18 Address: Research Center for Genetic Engineering, National Research and Innovation  
19 Agency, Gedung Admin OR Hayati dan Lingkungan, BRIN, Jl. Raya Bogor KM 46,  
20 Cibinong, Bogor, 16911, Indonesia

21 email: [enda041@brin.go.id](mailto:enda041@brin.go.id)

22

23

24

25 **AUTHORS' CONTRIBUTION**

26 Conceptualization: Septisetyani EP. Data curation: Lestari D, Prasetyaningrum PW,  
27 Paramitasari KA, Kastian RF, Septisetyani EP. Writing - original draft: Septisetyani EP,  
28 Lestari D, Paramitasari KA. Writing - review & editing: Septisetyani EP, Prasetyaningrum  
29 PW, Anam K, Santoso A., Eriani K.

30

31

32

33

34

35

36

37

38

39

40

41

42

43

44

45

46 **Curcumin and turmeric extract inhibit SARS-CoV-2 pseudovirus cell entry and spike-**  
47 **mediated cell fusion**

48

49 Turmeric extract (TE) with curcumin as its main active ingredient has been studied as a  
50 potential COVID-19 therapeutic. Curcumin has been studied in silico and in vitro against a  
51 naive SARS-CoV-2 virus, yet little is known about TE's impact on SARS-CoV-2 infection.  
52 Moreover, no study reveals the potential of both curcumin and TE on the inhibition of SARS-  
53 CoV-2 cell-to-cell transmission. Here, we investigated the effects of both curcumin and TE on  
54 inhibiting SARS-CoV-2 entry and cell-to-cell transmission using pseudovirus (PSV) and  
55 syncytia models. We performed a PSV entry assay in 293T or 293 cells expressing hACE2.  
56 The cells were pretreated with curcumin or TE and then treated with PSV with or without the  
57 test samples. Next, we carried out syncytia assay by co-transfecting 293T cells with plasmids  
58 encoding spike, hACE2, and TMPRSS2 to be treated with the test samples. The results showed  
59 that in PSV entry assay on 293T/hACE/TMPRSS2 cells, both curcumin and TE inhibited PSV  
60 entry at concentrations of 1  $\mu$ M and 10  $\mu$ M for curcumin and 1  $\mu$ g/ml and 10  $\mu$ g/ml for TE.  
61 Moreover, both curcumin and TE reduced syncytia formation compared to control cells. Our  
62 study shows that TE and curcumin are potential inhibitors of SARS-CoV-2 infection at entry  
63 points, either by direct or indirect infection models.

64 **Keywords:** COVID-19, curcumin, pseudovirus, SARS-CoV-2, syncytia, turmeric extract.

65

66

67

68 **GRAPHICAL ABSTRACT:**

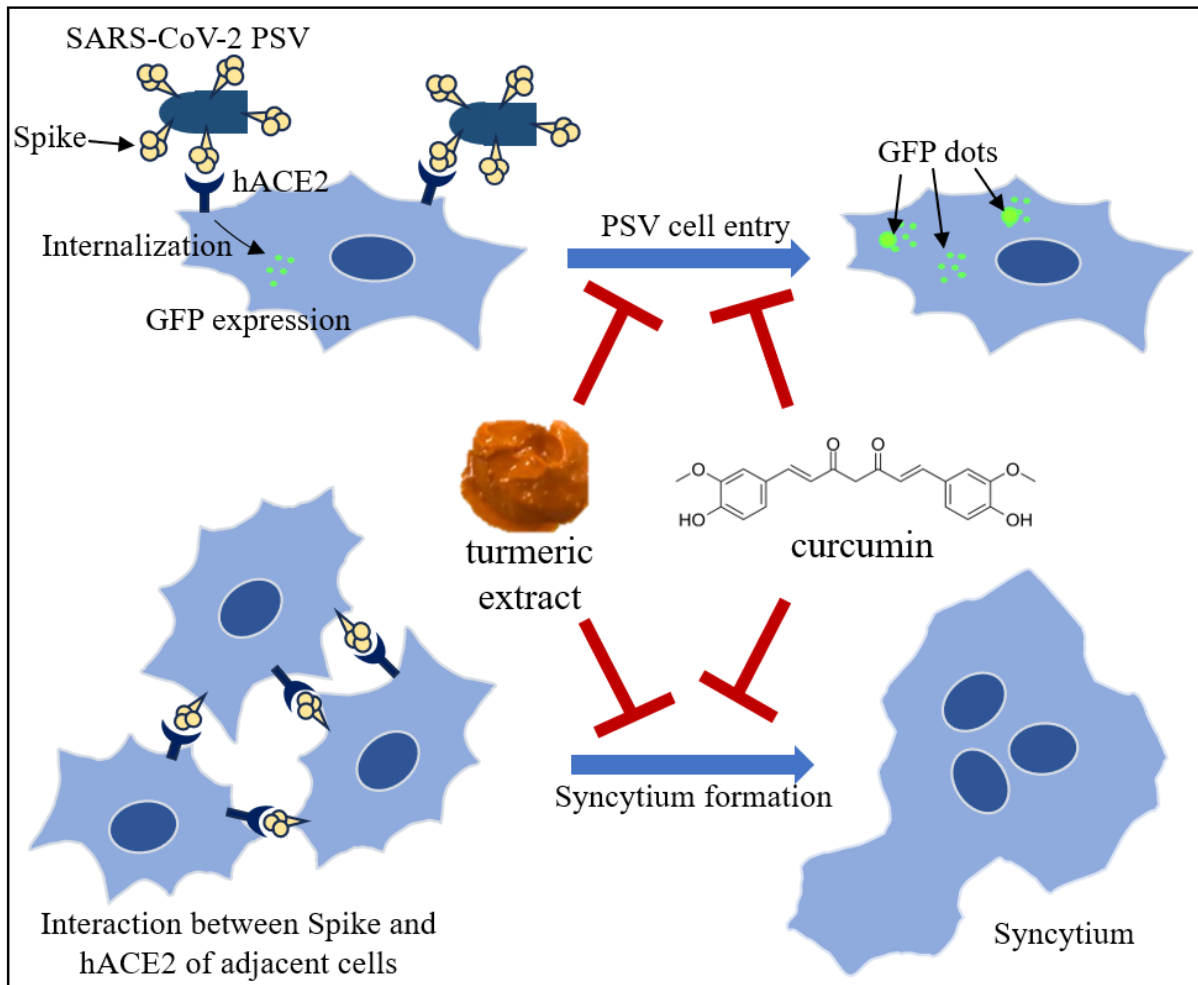

69

70

71

72

73

74

75

76

77

## 78 1. INTRODUCTION

79 SARS-CoV-2 can infect the target cells by direct viral infection and cell-to-cell  
80 transmission.<sup>1,2)</sup> The first mode of viral infection has been widely explored by studying cell  
81 and organ tropisms. SARS-CoV-2 infection toward various cell types has been performed,  
82 which includes studies using pulmonary cancer cells Calu-3, kidney cells 293FT, liver cells  
83 Huh7, colon cancer cells CaCO2, and Vero.<sup>3,4,5)</sup> In addition, organ tropisms have been studied  
84 using post-mortem tissue samples from COVID-19 patients and organoid models.<sup>6)</sup> Based on  
85 these studies, SARS-CoV-2 tropisms are strongly related to hACE2 expression as its target  
86 receptor and TMPRSS2 protease, which enhances the viral entry process. SARS-CoV-2  
87 infection involves the interaction of spike glycoprotein with hACE2, with or without spike  
88 priming by TMPRSS2, to facilitate cell entry through endocytosis or membrane fusion  
89 mechanisms.<sup>1,7)</sup>

90 In addition, SARS-CoV-2 can be transmitted through a cell-to-cell mechanism, which  
91 induces cell-to-cell fusion and syncytia formation.<sup>8)</sup> Syncytia has been found in the lungs of  
92 patients infected with SARS-CoV-2.<sup>9)</sup> SARS-CoV-2 infection induces spike glycoprotein  
93 expression. Eventually, as a transmembrane protein, spike protein will be transported to the  
94 plasma membrane with the receptor binding domain (RBD) at the extracellular position, ready  
95 for receptor binding. Similar to the virally integrated spike as the outer protein, cellular spike  
96 protein can also bind to the adjacent cells' hACE2 receptor, which further induces cell-to-cell  
97 fusion and finally forms a multinucleated giant cell or syncytium.<sup>8,9)</sup> Syncytia formation has  
98 been implicated with the severity of COVID-19 prognosis by several mechanisms, including  
99 immune cell phagocytosis, antibody evasion, and induction of syncytial cell death.<sup>10)</sup>

100 Due to the availability of registered COVID-19 drugs and the continuous emergence of  
101 daily COVID-19 cases, alternative treatments that can be easier to obtain for preventing and

102 treating future COVID-19 cases are essential to be developed. Turmeric (*Curcuma longa* L.) is  
103 a WHO-selected medicinal plant growing in tropical areas.<sup>11)</sup> Turmeric rhizome has been  
104 processed into turmeric decoction and turmeric extract, and some have been developed as a  
105 standardized medicinal extract. Turmeric extract contains curcuminoid active compounds, with  
106 curcumin as its main component.<sup>12)</sup> Compared to the control group, Clinical studies have  
107 demonstrated the effect of nano-encapsulated curcumin in reducing clinical manifestations of  
108 COVID-19, such as fever, cough, and dyspnea.<sup>13,14)</sup>

109 In silico analysis showed that curcumin has a high affinity for binding to the spike  
110 glycoprotein through the formation of six hydrogen bonds,<sup>15)</sup> thus, curcumin has the potential  
111 to prevent the binding of the viral spike protein to the ACE2 receptor and inhibit the initiation  
112 of the host cell infection process. Moreover, curcumin forms four hydrophobic interactions via  
113 hydrogen bonds with TMPRSS2, which may inhibit cellular entry through the cell fusion  
114 mechanism.<sup>16)</sup>

115 A plaque assay study in Vero cells has shown that curcumin inhibits SARS-CoV-2  
116 infection in pre- and post-treatment of the D614 strain and Delta variant.<sup>17)</sup> A study by Bormann  
117 *et al.* shows that turmeric root juice and curcumin showed inhibition of SARS-CoV-2 infection  
118 in Vero and Calu-3 cells determined by plaque assay and in-cell ELISA to detect the signal of  
119 SARS-CoV-2 nucleocapsid protein (N).<sup>18)</sup> Nonetheless, the effect of turmeric extract (TE) on  
120 SARS-CoV-2 infection is less studied than curcumin. Moreover, there is no report about the  
121 effects of both curcumin and TE on SARS-CoV-2 cell-to-cell transmission. In the present  
122 study, we examined the effects of TE and curcumin on inhibiting SARS-CoV-2 infection using  
123 the pseudovirus (PSV) and syncytia models for targeting viral entry points and cell-to-cell  
124 transmission.

125

## 126 **2. MATERIALS AND METHODS**

### 127 **2.1. Cell culture and reagents**

128 The 293T (ECACC 12022001), CHO-K1 (ECACC 85051005), and 293 (ECACC 85120602)  
129 cell lines are collections of the Research Center for Genetic Engineering, National Research  
130 and Innovation Agency (BRIN, Indonesia). 293T cells were cultured in High-Glucose  
131 Dulbecco's-modified Eagle's medium (Gibco, Billings USA) supplemented with 10% (v/v) of  
132 heat-inactivated fetal bovine serum (Sigma-Aldrich, St. Louis USA) and antibiotics (100 µg/ml  
133 streptomycin and 100 U/ml penicillin). CHO-K1 cells were cultured in F-12 medium (Sigma-  
134 Aldrich, St. Louis USA) supplemented with 10% (v/v) of heat-inactivated fetal bovine serum  
135 and antibiotics (100 µg/ml streptomycin and 100 U/ml penicillin). 293 cells were cultured in  
136 MEM medium (Sigma-Aldrich, St. Louis USA) supplemented with 10% (v/v) of heat-  
137 inactivated fetal bovine serum, 1% NEAA (Gibco, Billings USA), and antibiotics (100 µg/ml  
138 streptomycin and 100 U/ml penicillin). Cells were grown inside a 37 °C tissue culture incubator  
139 at 5% CO<sub>2</sub>. The pcDNA3.1-SARS2-Spike (a gift from Fang Li; Addgene plasmid #145032),<sup>19)</sup>  
140 pcDNA3.1-hACE (a gift from Fang Li; Addgene plasmid #145033),<sup>19)</sup> and TMPRSS2 (a gift  
141 from Roger Reeves; Addgene #53887) plasmids were obtained from Addgene.<sup>20)</sup> Cells were  
142 transfected with expression vectors using polyethylenimine (PEI MAX® - Transfection Grade  
143 Linear Polyethylenimine Hydrochloride (MW 40,000), Polysciences).

### 144 **2.2. Turmeric extract and curcumin preparation**

145 Turmeric extract (TE) was purchased as soft capsules (Natural Sari Kunyit, POM TR  
146 192333771) from a GMP-certified manufacturer (PT. Industri Jamu dan Farmasi Sido Muncul  
147 Tbk., Semarang, Indonesia). Each capsule was standardized to contain 350 mg of concentrated  
148 liquid extract, equal to 100 mg of curcuminoids. The TE was dissolved in DMSO at 50 mg/mL,  
149 and the stock was stored at -20 °C. The working solution was freshly prepared by serially  
150 diluting the stock in culture media. Curcumin was obtained from Sigma (Cat. No. C1386-10G,

151 Lot#SLBD0850V) (Sigma-Aldrich, St. Louis, USA), reconstituted in DMSO at 50 mM, and  
152 maintained as the stock at -20 °C. For every treatment involving curcumin, the working  
153 solution was made at 10 and 100 µM concentrations by diluting the stock with complete culture  
154 media with a maximum final concentration of DMSO less than 1%.

### 155 **2.3. MTT assay**

156 MTT cell viability assay was carried out in CHO-K1 and 293T cells. One day before the MTT  
157 assay,  $8 \times 10^4$  293T or  $7 \times 10^4$  CHO-K1 cells per ml were seeded onto a 96-well plate. The next  
158 day, the cells were treated and incubated with culture media containing various concentrations  
159 of TE or curcumin for about 24 h. A set of wells containing cells without treatment and another  
160 were prepared with medium only for background subtraction (blank). Following incubation,  
161 the culture media containing TE or curcumin were discarded, and cells were washed with 1X  
162 PBS. The cells were then incubated for 2 hours in 0.5 mg/mL MTT solution (3-(4,-5-  
163 dimethylthiazo-2-yl)-2,5-diphenyltetrazolium bromide). At the end of incubation, MTT  
164 reagents were discarded, and 100 µl of DMSO were added to each well and agitated at 100 rpm  
165 for 10 minutes to ensure complete formazan crystals solubilization. Finally, the absorbance of  
166 each well was recorded at 570 nm wavelength. Cell viability was calculated according to the  
167 formula:  $(OD_{\text{treated}} - OD_{\text{blank}}) / (OD_{\text{untreated}} - OD_{\text{blank}}) \times 100\%$

### 168 **2.4. Western blot**

169 Cell lysates were prepared using ice-cold RIPA buffer (Abcam, USA) with the addition of a  
170 protease inhibitor cocktail. The total protein concentration was determined by BCA assay  
171 (Thermo Scientific). About 10-40 µg protein was subjected to SDS-PAGE, and then the  
172 resolved protein was transferred onto an activated PVDF membrane. The membrane was then  
173 incubated in blocking buffer (5% skim milk in TBS/0.05% tween-20) followed by blotting with  
174 primary antibodies (anti-SARS-CoV-2 spike (Abcam ab275759, USA) 1:2,000 or anti-β-actin  
175 (Sigma A2228, USA) 1:4,000) for 2 h at room temperature or overnight at 4°C. After washing



176 with TBS/T, the membrane was incubated in secondary antibodies (ALP-conjugated antibodies  
177 (Abcam ab6722), 1:4,000 or IR-Dye conjugated antibodies (LI-COR IRDye-680 RD),  
178 1:10,000) in blocking buffer for about 2 h at room temperature or overnight at 4°C. Western  
179 blot signal was detected by incubating the membrane with 1-Step<sup>TM</sup> NBT-BCIP substrate  
180 solution (Thermo Scientific 34042) or observed by a LI-COR Odyssey CLx instrument.

## 181 **2.5. Immunofluorescence staining**

182 The 293T cells were seeded at a density of  $3 \times 10^4$  cells/well on gelatin-coated cover glass placed  
183 inside a 24-well plate. After about 3 h incubation, the cells were transfected overnight with the  
184 pcDNA3.1-hACE2 expression vector. Transfected cells were washed with 1X PBS and fixed  
185 with 4% paraformaldehyde for 10 min. Upon fixation, cells were permeabilized with 0.2 %  
186 Triton-X, then incubated for 30 min at RT with blocking buffer (1% Bovine Serum Albumin  
187 in 1X PBS) and further incubated for at least 1 hour at RT with rabbit anti-hACE2 antibody  
188 (SAB 3500978, Sigma-Aldrich) or rabbit anti-TMPRSS2 antibody (BS-6285R, Bioss) diluted  
189 in blocking buffer (1:250). Following primary antibody staining, cells were washed three times  
190 with 1X PBS and incubated with goat anti-rabbit Alexa Fluor<sup>TM</sup> 594 or 488 secondary antibody  
191 (1:1,000) for 1 hour at RT. The secondary antibody was then washed with 1X PBS three times,  
192 and the nuclei were stained with DAPI (4',6-diamidino-2-phenylindole)-containing mountant  
193 (Abcam Ab104139). Samples were imaged with a motorized fluorescence microscope  
194 (Olympus IX83, Tokyo, Japan).

## 195 **2.6. Preparation of SARS-CoV-2 pseudovirus**

196 Pseudotyping was performed in 293T cells transfected with a plasmid encoding SARS-CoV-2  
197 spike (293T/spike). Briefly, 293T/spike cells were incubated at MOI ~3 for 1 h with  
198 pseudotyped G\*ΔG-GFP rVSV (Kerafast EH1024-PM).<sup>21)</sup> Then, the medium was replaced  
199 with a fresh medium containing anti-VSV-G antibody 1:2,000 to neutralize the excess of  
200 G\*ΔG-GFP rVSV and left overnight in the CO<sub>2</sub> incubator. A conditioned medium (CM)

201 containing pseudotyped spike\*ΔG-GFP rVSV (SARS-CoV-2 pseudovirus) was collected and  
202 spun the next day to remove cell debris. The supernatant was aliquoted and stored at -80° C  
203 before being used for PSV entry assay.

## 204 **2.7. Pseudovirus entry assay**

205 PSV entry assay study was performed in the target cells of 293T transiently overexpressing  
206 hACE2 and TMPRSS2 (293T/hACE2/TMPRSS2) or 293 cells stably expressing hACE2  
207 (293/hACE2) prepared using lentivirus system. Briefly,  $4 \times 10^5$  293T cells were grown in each  
208 well of an 8-well chamber slide (SPL Life Sciences, Pyeongtaek, South Korea) previously  
209 coated with 2% gelatin. Upon overnight incubation, the cells were transfected with vectors  
210 harboring hACE2 and TMPRSS2 by using PEI. The next day, the medium was aspirated from  
211 the cell monolayers, and cells were subjected to pretreatment with a complete medium  
212 containing TE at 10 and 100 μg/ml or curcumin at 10 and 100 μM for 30 min. Then, the medium  
213 was removed, and the PSV was added at 1:2 ratios in 300 μl of medium containing TE or  
214 curcumin. After 16 h of viral infection, the cells were fixed and mounted. Finally, the images  
215 of GFP dots that represented the internalization of pseudovirus were acquired using a motorized  
216 fluorescence microscope (Olympus IX83). The GFP dots were counted from 8 different areas  
217 and analyzed by Fiji software (National Institute of Health).

218 The 293/hACE2 stable cells were generated by transduction of 293 cells using  
219 lentivirus produced in 293T cells utilizing plasmids: pCMV-dR8.2-dvpr (a gift from Bob  
220 Weinberg; Addgene #8455);<sup>22)</sup> pCAGGS-G-Kan (Kerafast EH1017); and  
221 RRL.sin.cPPT.SFFV/Ace2.IRES-neo.WPRE(MT129) (a gift from Caroline Goujon; Addgene  
222 plasmid #145840).<sup>23)</sup> The 293/hACE2 population were then maintained in culture medium  
223 containing G418 to obtain 293 cells that stably expressing recombinant hACE2. For the PSV  
224 entry assay using 293/hACE2, the cells were grown onto gelatin-coated 8-chamber slides and

225 incubated overnight before PSV treatment. The GFP dots were counted from 5 different areas  
226 and analyzed by Fiji software.

## 227 **2.8. Syncytia inhibition assay**

228 293T cells were seeded in a 24-well plate at  $1.4 \times 10^5$  cells/ml density in DMEM supplemented  
229 with 10% FBS. After overnight incubation, the cells were co-transfected with plasmids bearing  
230 SARS-CoV-2 spike, hACE2, and TMPRSS2 and incubated for about 6 h. Subsequently, 500  
231  $\mu$ l/well of dilutions of curcumin at 1 and 10  $\mu$ M or turmeric extract at 1  $\mu$ g/ml and 10  $\mu$ g/ml  
232 was added to cell monolayers in duplicate and incubated for about 16 h. The following day,  
233 syncytia formation was observed using an inverted microscope (Olympus CKX53), and 10  
234 images were acquired to represent each well. The number of syncytia was calculated with Fiji  
235 software and then sorted based on the number of nuclei using 4 categories: (i) <5 nuclei, (ii) 6-  
236 10 nuclei, (iii) 11-15 nuclei, and (iv) >15 nuclei.

## 237 **2.9. Statistical analysis**

238 Data were presented as mean  $\pm$  SD (standard deviation) as indicated in each figure. Student's  
239 t-test calculated statistical differences and a *p*-value <0.05 was considered significant.

240

## 241 **3. RESULTS**

### 242 **3.1. Cell viability assay of curcumin and TE on CHO-K1 and 293T cells**

243 Curcumin and TE have been known to show cytotoxic effects in various cancer cells, for  
244 instance, breast cancer cells, colorectal cancer cells, and brain cancer cells.<sup>24)</sup> Also, even though  
245 curcumin and TE show less cytotoxicity against normal cells at high concentrations, the toxic  
246 effects could still be observed.<sup>25)</sup> Therefore, before we investigated their antiviral activities, we  
247 evaluated the cytotoxicity of curcumin and TE on CHO-K1 and 293T cells to determine the  
248 non-toxic concentration to be used in PSV entry and syncytia fusion assays.

249 We applied 1, 5, 10, 25, and 50  $\mu\text{M}$  curcumin serial concentrations and 1, 5, 10, 25, and  
250 50  $\mu\text{g/ml}$  TE for MTT assay in CHO-K1 cells. The results showed that after 24 hours of  
251 curcumin treatment, the cell viability was 91.7, 96.09, 92.64, 39.06, and 35.19% as the  
252 concentration increased (**Fig 1a**). In addition, after a 24-hour treatment, CHO-K1 cell viability  
253 declined according to increased TE concentrations of 95.82, 91.08, 72.61, 41.66, and 26.27 %, ,  
254 respectively (**Fig 1b**). Moreover, we tested the effect of curcumin and TE in 293T cells using  
255 serial concentrations of 1, 10, and 100  $\mu\text{M}$  curcumin or 1, 10, and 100  $\mu\text{g/ml}$  TE for 24 h. The  
256 results indicated that the cell viability of 293T cells after curcumin treatment was 86.52, 74.18,  
257 and 11.09 % (**Fig 1c**). In addition, the cell viability after TE treatment was 81.52, 76.54, and  
258 5.33 %, respectively (**Fig 1d**). Higher concentrations of tested samples significantly reduced  
259 cell viability, with the 293T cells showing more susceptibility to curcumin and TE treatment  
260 than CHO-K1 cells. Therefore, to minimize the cytotoxic effect of tested samples in further  
261 assays, we applied lower concentrations of curcumin (1 and 10  $\mu\text{M}$ ) and TE (1 and 10  $\mu\text{g/ml}$ )  
262 and treated the cells for only about 16-18 h.

### 263 **3.2. Pseudovirus entry assay**

264 We prepared SARS-CoV-2 PSV with a VSV backbone and GFP reporter in spike-  
265 transfected 293T cells (pseudotyped spike\* $\Delta\text{G}$ -GFP rVSV). Spike expression in 293T/spike  
266 cells used for pseudotyping was confirmed by Western blot. Moreover, we also detected spike  
267 in the CM obtained after pseudotyping, indicating the formation of SARS-CoV-2 pseudovirus  
268 and its release into the culture medium (**Fig 2**).

269 Furthermore, we used the CM to perform a PSV entry assay in 293T overexpressing  
270 hACE2/TMPRSS2 and 293/ACE2 stable cells. The 293T/hACE2/TMPRSS2 cells were  
271 pretreated with curcumin or TE for 30 min, then treated with PSV/curcumin or PSV/TE,  
272 followed by 16-18 h incubation in a  $\text{CO}_2$  incubator. GFP expression indicating PSV

273 internalization and viral genome release was observed by fluorescence microscopy with 60x  
274 magnification to expose the GFP dots (**Fig 3a**). To confirm that GFP dots were formed within  
275 the cells, we also observed the cells in bright field mode and used DAPI to stain the nuclei. The  
276 representative images are shown in **Fig 3b**. As the results showed, nontreated cells showed a  
277 higher number of GFP dots compared to the treated cells with fluorescence focus units (FFU)  
278  $296 \pm 2$ . The FFU of cells treated with curcumin 1 and 10  $\mu\text{M}$  were  $141 \pm 8.76$  and  $56 \pm 6.52$ .  
279 Whereas FFU of cells treated with TE 1 and 10  $\mu\text{g/ml}$  were  $81 \pm 5.93$  and  $49 \pm 3.31$ . Cells treated  
280 with curcumin and TE significantly reduced the FFU number, especially at higher  
281 concentrations, indicating the potential inhibitory effect on SARS-CoV-2 viral cell entry (**Fig**  
282 **3c**).

283         Next, we clarified the inhibitory effect of curcumin as the active compound to inhibit  
284 SARS-CoV-2 PSV entry by performing an entry assay in 293 cells that stably expressed ACE2  
285 (293/ACE2) (**Fig 4a**). Besides treating the 293/ACE2 cells with curcumin before PSV addition,  
286 the curcumin was combined with PSV after incubation for 30 min (**Fig 4b**). The representative  
287 images of cells after the PSV entry assay are shown in **Fig 4c**. As a quantification result, the  
288 number of GFP dots/cell for non-treated cells was 1.45. The number of GFP dots per cell in  
289 curcumin and PSV/curcumin-treated cells was 0.99, while the number of GFP dots per cell in  
290 curcumin-treated cells was 0.887. The results indicated that curcumin reduced PSV entry,  
291 especially for curcumin pretreatment before the addition of PSV ( $P = 0.035$ ) (**Fig 4d**).

### 292 **3.3. Syncytia formation assay**

293         This assay represents the cells infected with SARS-CoV-2 and expressing its membrane  
294 protein spike, which can bind the hACE2 receptor of the adjacent cell. Instead of using the  
295 original virus, we transfected the cells directly with spike plasmid. We used 293T cells  
296 transfected with plasmids encoding SARS-CoV-2 spike, hACE2, and TMPRSS2 to perform

297 the syncytia assay. The cells expressing spike will locate the Spike in the transmembrane  
298 region, enabling the interaction between spike with the hACE2 receptor and TMPRSS2 of the  
299 adjacent cells. As a result, the two interacting cells will form an intercellular bridge that  
300 eventually will fuse and form multinucleated cells.<sup>26)</sup> The more cells interact and fuse, the more  
301 multinucleated cells or syncytia will be generated, as shown in **Fig 5a**.

302 We show that 293T cells, after transfection and treatment with DMSO 0.1% and 1%,  
303 formed syncytia as much as 31.4 and 15.75 per field. In addition, the treatment of cells with  
304 curcumin and TE reduced the number of syncytia. The number of syncytia formed after cell  
305 treatment with curcumin 1 and 10  $\mu$ M was 15.85 ( $P<0.0001$  vs DMSO 0.1%) and 5.5  
306 ( $P<0.0001$  vs DMSO 1%), while the number of syncytia formed after cell treatment with TE 1  
307 and 10  $\mu$ g/ml was 14.05 ( $P<0.0001$  vs DMSO 0.1%) and 6.6 ( $P<0.0001$  vs DMSO 0.1%) (**Fig**  
308 **5b**).

309 Furthermore, we analyzed the distribution of nuclei numbers within the syncytia and  
310 categorized them into  $<5$ , 5-10, 11-15, and  $>15$ . The syncytia with nuclei number  $<5$  for DMSO  
311 0.1, curcumin 1  $\mu$ M, and TE 1  $\mu$ g/ml were 3.65, 4.25, 2, while nuclei number 5-10 were 9.8,  
312 4.5, 35.5, nuclei no 11-15 were 5.95, 3.3, 4.35, and nuclei number  $>15$  were 11.75, 2.8, 4.25.  
313 The syncytia with nuclei number  $<5$  for DMSO 1, curcumin 10  $\mu$ M and TE 10  $\mu$ g/ml were 2,  
314 2, 1.8, while nuclei number 5-10 were 6.05, 1.75, 2.3, nuclei no 11-15 were 3.85, 0.9, 1.85, and  
315 nuclei no  $>15$  were 3.85, 0.4, 0.85. These data indicated that treatment of the cells with  
316 curcumin and TE reduced the nuclei number within syncytia, representing lower fusion events  
317 than the DMSO treatment (**Fig 5c**).

#### 318 **4. DISCUSSION**

319 Curcumin has been tested for its anti-SARS-CoV-2 activities by plaque assay in Vero  
320 cells. Using the original virus, curcumin inhibits SARS-CoV-2 infection.<sup>17)</sup> However, surface

321 receptors in Vero cells differ from human cells, and the study may not correlate well with actual  
322 events.<sup>27)</sup> Thus, the antiviral study of curcumin has also been carried out using human Calu-3  
323 cells, which endogenously express hACE2 and TMPRSS2. A study using these cells  
324 demonstrated that curcumin may inhibit SARS-CoV-2 viral replication as indicated by reduced  
325 N protein expression following viral infection.<sup>18)</sup> Besides investigating curcumin's antiviral  
326 effect, Bormann *et al.* also tested the effect of turmeric juice (water extract).<sup>18)</sup> However, the  
327 antiviral study of turmeric extract (TE) has not been widely reported compared to its active  
328 compound, curcumin.

329         In this manuscript, we reported the SARS-CoV-2 antiviral activities of curcumin and  
330 TE, especially at the entry point, using the pseudovirus and syncytia models to represent cell-  
331 to-cell transmission. Here, we showed that curcumin and TE reduced PSV entry in  
332 293T/hACE2/TMPRSS2 cells, in which 10  $\mu$ M curcumin and 10  $\mu$ g/ml TE significantly  
333 affected the number of GFP dots. The effect of TE was comparable to the curcumin effect on  
334 PSV cell entry in which 10  $\mu$ g/ml TE was equal to 2.86  $\mu$ g/ml curcuminoid, with the majority  
335 of curcumin content and 10  $\mu$ M curcumin being equal to 3.68  $\mu$ g/ml of curcumin.

336         From the previous studies, Marin-Palma *et al.* reported that 10  $\mu$ M curcumin can inhibit  
337 SARS-CoV-2 infection in Vero E6 cells.<sup>17)</sup> It is also reported that curcumin inhibits SARS-  
338 CoV-2 infection at concentrations of 3-10  $\mu$ M.<sup>28)</sup> Furthermore, in A549 cells, curcumin shows  
339 SARS-CoV-2 antiviral concentration of 5  $\mu$ M.<sup>29)</sup> We also showed that curcumin inhibited PSV  
340 entry in 293/hACE2 cells. These results corroborate curcumin effects against SARS-CoV-2  
341 infection with our data representing curcumin inhibition at PSV cell entry point. It has been  
342 known that curcumin affects the early stages of viral replication cycles, including viral-receptor  
343 attachment, internalization, and fusion that have been studied against several types of viruses,  
344 which involve influenza, dengue, zika, chikungunya, pseudorabies, and VSV.<sup>30,31,32)</sup>

345           Moreover, curcumin and TE inhibit secondary infection via cell-to-cell transmission in  
346 a syncytia formation model mediated by SARS-CoV-2 spike expression. Cells treated with  
347 curcumin and TE showed smaller syncytia with fewer nuclei than control cells. The more cells  
348 fused to generate syncytia, the larger syncytia with more nuclei will be formed, and vice versa.

349           Based on *in silico* data, curcumin can also interact with SARS-CoV-2 spike RBD,<sup>33)</sup>  
350 hACE2,<sup>34)</sup> and TMPRSS2.<sup>16)</sup> These data align with our results that curcumin inhibited PSV  
351 entry and syncytia formation. Our *in vitro* study using PSV and syncytia models revealed that  
352 both curcumin and TE are potential inhibitors of SARS-CoV-2 infection, especially at the entry  
353 points either by direct infection or cell-to-cell transmission mediated by spike-induced cell  
354 fusion. Curcumin can interfere with the spike-receptor binding during direct viral or  
355 intercellular transmission, hindering viral infection and cell fusion.<sup>17)</sup> In addition, TE, as the  
356 crude extract that contains curcumin, also has the potential to inhibit SARS-CoV-2 infection  
357 and potentially to be developed as an independent herbal-derived product for the prevention of  
358 viral infection with curcuminoids used as identity compounds for TE standardization.

359

## 360 **ACKNOWLEDGEMENTS**

361           We are grateful for the financial support from the Educational Fund Management  
362 Institution/National Research and Innovation Agency (LPDP/BRIN) (grant no. 102/FI/P-  
363 KCOVID-19.2B3/IX/2020 and RIIM No. KEP-5/LPDP/LPDP.4/2022) and Research  
364 Organization for Life Sciences and Environment, BRIN (Research Program (DIPA Rumah  
365 Program) 2022).

366

## 367 **CONFLICT OF INTEREST**



368 The authors declared no potential conflict of interest.

369

370 **REFERENCES**

- 371 1) Jackson CB, Farzan M, Chen B, Choe H. Mechanisms of SARS-CoV-2 entry into cells.  
372 *Nat. Rev. Mol. Cell. Biol.*, **23**, 1–18 (2021).
- 373 2) Rajah MM, Hubert M, Bishop E, Saunders N, Robinot R, Grzelak L, Planas D, Dufloo  
374 J, Gellenoncourt S, Bongers A, Zivaljic M, Planchais C, Guivel-Benhassine F, Porrot F,  
375 Mouquet H, Chakrabarti LA, Buchrieser J, Schwartz O. SARS-CoV-2 Alpha, Beta, and  
376 Delta variants display enhanced spike-mediated syncytia formation. *EMBO J.*, **40**,  
377 e108944 (2021).
- 378 3) Hoffmann M, Kleine-Weber H, Schroeder S, Krüger N, Herrler T, Erichsen S, S,  
379 Schiergens TS, Herrler G, Wu NH, Nitsche A, Müller MA, Drosten C, Pöhlmann. SARS-  
380 CoV-2 cell entry depends on ACE2 and TMPRSS2 and is blocked by a clinically proven  
381 protease inhibitor. *Cell*, **181**, 271-280 (2020).
- 382 4) Katopodis P, Randeva HS, Spandidos DA, Saravi S, Kyrou I, Karteris E. Host cell entry  
383 mediators implicated in the cellular tropism of SARS-CoV-2, the pathophysiology of  
384 COVID-19 and the identification of microRNAs that can modulate the expression of  
385 these mediators (Review). *Int. J. Mol. Med.*, **49**, 20 (2022).
- 386 5) Saccon E, Chen X, Mikaeloff F, Rodriguez JE, Szekely L, Vinhas BS, Krishnan S,  
387 Byrareddy SN, Frisan T, Végvári Á, Mirazimi A, Neogi U, Gupta S. Cell-type-resolved  
388 quantitative proteomics map of interferon response against SARS-CoV-2. *iScience*, **24**,  
389 102420 (2021).
- 390 6) Peng L, Gao L, Wu X, Fan Y, Liu M, Chen J, Song J, Kong J, Dong Y, Li B, Liu A, Bao  
391 F. Lung organoids as model to study SARS-CoV-2 infection. *Cells*, **11**, 2758 (2022).

- 392 7) Hirano T, Murakami M. COVID-19: A new virus, but a familiar receptor and cytokine  
393 release syndrome. *Immunity*, **52**, 731-733 (2020).
- 394 8) Zheng Y, Zhou LL, Su Y, Sun Q. Cell fusion in the pathogenesis of COVID-19. *Mil.*  
395 *Med. Res.*, **8**, 68 (2021).
- 396 9) Lin L, Li Q, Wang Y, Shi Y. Syncytia formation during SARS-CoV-2 lung infection: a  
397 disastrous unity to eliminate lymphocytes. *Cell Death Differ.*, **28**, 2019–2021, (2021).
- 398 10) Rajah MM, Bernier A, Buchrieser J, Schwartz O. The mechanism and consequences of  
399 SARS-CoV-2 spike-mediated fusion and syncytia formation. *J. Mol. Biol.*, **434**, 167280  
400 (2022).
- 401 11) World Health Organization. *Rhizoma Curcumae Longae. WHO monographs on selected*  
402 *medicinal plants*. Vol. 1, WHO, Geneva, pp. 115-124 (1999).
- 403 12) Sharifi-Rad J, Rayess YE, Rizk AA, Sadaka C, Zgheib R, Zam W, Sestito S, Rapposelli  
404 S, Neffe-Skocińska K, Zielińska D, Salehi B, Setzer WN, Dosoky NS, Taheri Y, El  
405 Beyrouthy M, Martorell M, Ostrander EA, Suleria HAR, Cho WC, Maroyi A, Martins  
406 N. Turmeric and its major compound curcumin on health: bioactive effects and safety  
407 profiles for food, pharmaceutical, biotechnological and medicinal applications. *Front.*  
408 *Pharmacol.*, **11**, 01021 (2020).
- 409 13) Tahmasebi S, El-Esawi MA, Mahmoud ZH, Timoshin A, Valizadeh H, Roshangar L,  
410 Varshoch M, Vaez A, Aslani S, Navashenaq JG, Aghebati-Maleki L, Ahmadi M.  
411 Immunomodulatory effects of nanocurcumin on Th17 cell responses in mild and severe  
412 COVID-19 patients. *J. Cell Physiol.*, **236**, 5325–5338 (2021).
- 413 14) Valizadeh H, Abdolmohammadi-Vahid S, Danshina S, Ziya GM, Ammari A, Sadeghi A,  
414 Roshangar L, Aslani S, Esmaeilzadeh A, Ghaebi M, Valizadeh S, Ahmadi M. Nano-  
415 curcumin therapy, a promising method in modulating inflammatory cytokines in  
416 COVID-19 patients. *Int. Immunopharmacol.*, **89**, 107088 (2020).

- 417 15) Maurya VK, Kumar S, Prasad AK, Bhatt MLB, Saxena SK. Structure-based drug  
418 designing for potential antiviral activity of selected natural products from Ayurveda  
419 against SARS-CoV-2 spike glycoprotein and its cellular receptor. *Virusdisease*, **31**, 179–  
420 193 (2020).
- 421 16) Motohashi N, Vanam A, Gollapudi R. In silico study of curcumin and folic acid as potent  
422 inhibitors of human transmembrane protease serine 2 in the treatment of COVID-19.  
423 *INNOSC Theranostics and Pharmacological Sciences*, **16**, 3–9 (2020).
- 424 17) Marín-Palma D, Tabares-Guevara JH, Zapata-Cardona MI, Flórez-Álvarez L, Yepes  
425 LM, Rugeles MT, Zapata-Builes W, Hernandez JC, Taborda NA. Curcumin inhibits in  
426 vitro SARS-CoV-2 infection in Vero E6 cells through multiple antiviral mechanisms. *J.*  
427 *Molecules*, **26**, 6900 (2021).
- 428 18) Bormann M, Alt M, Schipper L, van de Sand L, Le-Trilling VTK, Rink L, Heinen N,  
429 Madel RJ, Otte M, Wuensch K, Heilingloh CS, Mueller T, Dittmer U, Elsner C, Pfaender  
430 S, Trilling M, Witzke O, Krawczyk A. Turmeric root and its bioactive ingredient  
431 curcumin effectively neutralize SARS-CoV-2 in vitro. *Viruses*, **13**,1914 (2021).
- 432 19) Shang J, Ye G, Shi K, Wan Y, Luo C, Aihara H, Geng Q, Auerbach A, Li F. Structural  
433 basis of receptor recognition by SARS-CoV-2. *Nature*, **581**, 221-224 (2020).
- 434 20) Edie S, Zaghoul NA, Leitch CC, Klinedinst DK, Lebron J, Thole JF, McCallion AS,  
435 Katsanis N, Reeves RH. Survey of human chromosome 21 gene expression effects on  
436 early development in *Danio rerio*. *G3 (Bethesda)*, **8**, 2215-2223 (2018).
- 437 21) Whitt MA. Generation of VSV pseudotypes using recombinant  $\Delta$ G-VSV for studies on  
438 virus entry, identification of entry inhibitors, and immune responses to vaccines. *J. Virol.*  
439 *Methods*, **169**, 365-374 (2010).

- 440 22) Stewart SA, Dykxhoorn DM, Palliser D, Mizuno H, Yu EY, An DS, Sabatini DM, Chen  
441 IS, Hahn WC, Sharp PA, Weinberg RA, Novina CD. Lentivirus-delivered stable gene  
442 silencing by RNAi in primary cells. *RNA*, **9**, 493-501 (2003).
- 443 23) Rebendenne A, Valadão ALC, Tauziet M, Maarifi G, Bonaventure B, McKellar J, Planès  
444 R, Nisole S, Arnaud-Arnould M, Moncorgé O, Goujon C. SARS-CoV-2 triggers an  
445 MDA-5-dependent interferon response which is unable to control replication in lung  
446 epithelial cells. *J. Virol.*, **95**, e02415-20 (2021).
- 447 24) Tomeh MA, Hadianamrei R, Zhao X. A review of curcumin and its derivatives as  
448 anticancer agents. *Int. J. Mol. Sci.*, **20**, 1033 (2019).
- 449 25) Li P, Pu S, Lin C, Liu H, Zhao H, Yang C, Guo Z, Xu S, Zhou Z. Curcumin selectively  
450 induces colon cancer cell apoptosis and S cell cycle arrest by regulates Rb/E2F/p53  
451 pathway. *J. Mol. Struct.*, **1263**, 133180 (2022).
- 452 26) Buchrieser J, Dufloo J, Hubert M, Monel B, Planas D, Rajah MM, Planchais C, Porrot  
453 F, Guivel-Benhassine F, Van der Werf S, Casartelli N, Mouquet H, Bruel T, Schwartz  
454 O. Syncytia formation by SARS-CoV-2-infected cells. *EMBO J.*, **39**, e106267 (2020).
- 455 27) Pandamooz S, Jurek B, Meinung CP, Baharvand Z, Sahebi Shahem-Abadi A, Haerteis  
456 S, Miyan JA, Downing J, Dianatpour M, Borhani-Haghighi A, Salehi MS. Experimental  
457 models of SARS-CoV-2 infection: possible platforms to study COVID-19 pathogenesis  
458 and potential treatments. *Annu. Rev. Pharmacol. Toxicol.*, **62**, 25-53 (2022).
- 459 28) Wen CC, Kuo YH, Jan JT, Liang PH, Wang SY, Liu HG, Lee CK, Chang ST, Kuo CJ,  
460 Lee SS, Hou CC, Hsiao PW, Chien SC, Shyur LF, Yang NS. Specific plant terpenoids  
461 and lignoids possess potent antiviral activities against severe acute respiratory syndrome  
462 coronavirus. *J. Med. Chem.*, **50**, 4087–4095 (2007).

- 463 29) Goc A, Sumera W, Rath M, Niedzwiecki A. Phenolic compounds disrupt spike-mediated  
464 receptor-binding and entry of SARS-CoV-2 pseudo-virions. *PLoS ONE*, **16**, e0253489  
465 (2021).
- 466 30) Mounce BC, Cesaro T, Carrau L, Vallet T, Vignuzzi M. Curcumin inhibits Zika and  
467 chikungunya virus infection by inhibiting cell binding. *Antivir. Res.*, **142**, 148–57 (2017).
- 468 31) Chen DY, Shien JH, Tiley L, Chiou SS, Wang SY, Chang TJ, Lee YJ, Chan KW, Hsu  
469 WL. Curcumin inhibits influenza virus infection and haemagglutination activity. *Food*  
470 *Chem.*, **119**, 1346–1351 (2010).
- 471 32) Chen TY, Chen DY, Wen HW, Ou JL, Chiou SS, Chen JM, Wong ML, Hsu WL.  
472 Inhibition of enveloped viruses infectivity by curcumin. *PLoS ONE*, **8**, e62482 (2013).
- 473 33) Shanmugarajan D, Prabitha P, Kumar BRP, Suresh B. Curcumin to inhibit binding of  
474 spike glycoprotein to ACE2 receptors: computational modelling, simulations, and  
475 ADMET studies to explore curcuminoids against novel SARS-CoV-2 targets. *RSC Adv.*,  
476 **10**, 31385-31399 (2020).
- 477 34) Subbaiyan A, Ravichandran K, Singh SV, Sankar M, Thomas P, Dhama K, Malik YS,  
478 Singh RK, Chaudhuri P. In silico molecular docking analysis targeting SARS-CoV-2  
479 spike protein and selected herbal constituents. *J. Pure Appl. Microbiol.*, **14**, 989-998  
480 (2020).
- 481
- 482
- 483
- 484
- 485
- 486

487

488

489

490

491 **FIGURE LEGENDS**

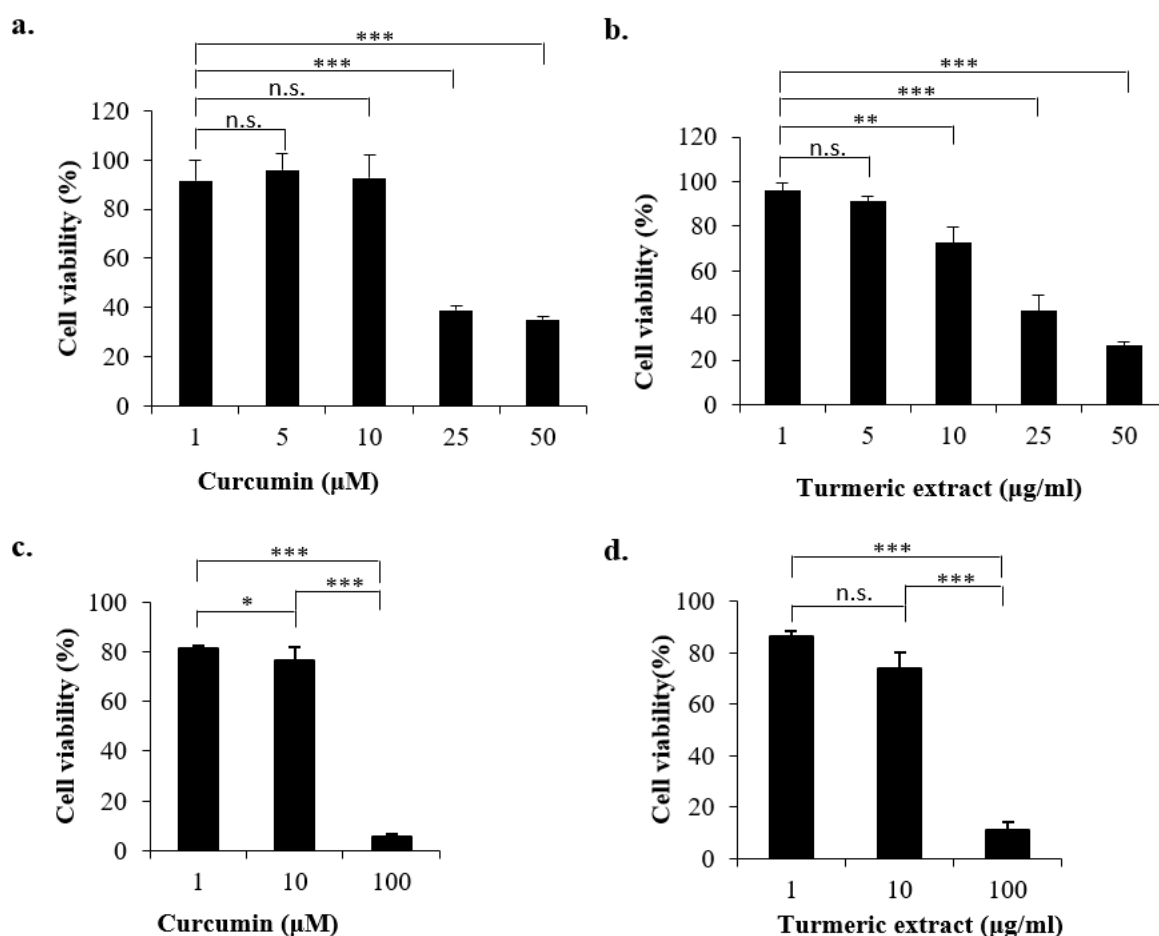

492

493 **Fig 1. CHO-K1 (a-b) cell viability profiles and 293T cells (c-d) after curcumin and**

494 **turmeric extract treatment.** Cells were plated onto a 96-well plate and treated with the tested

495 samples (n=3) for 24 h. The medium was then replaced with an MTT-containing medium and

496 incubated for 2 h. At the end of incubation, the formazan generated was dissolved with DMSO,

497 and the optical density was measured at 570 nm.

498

499

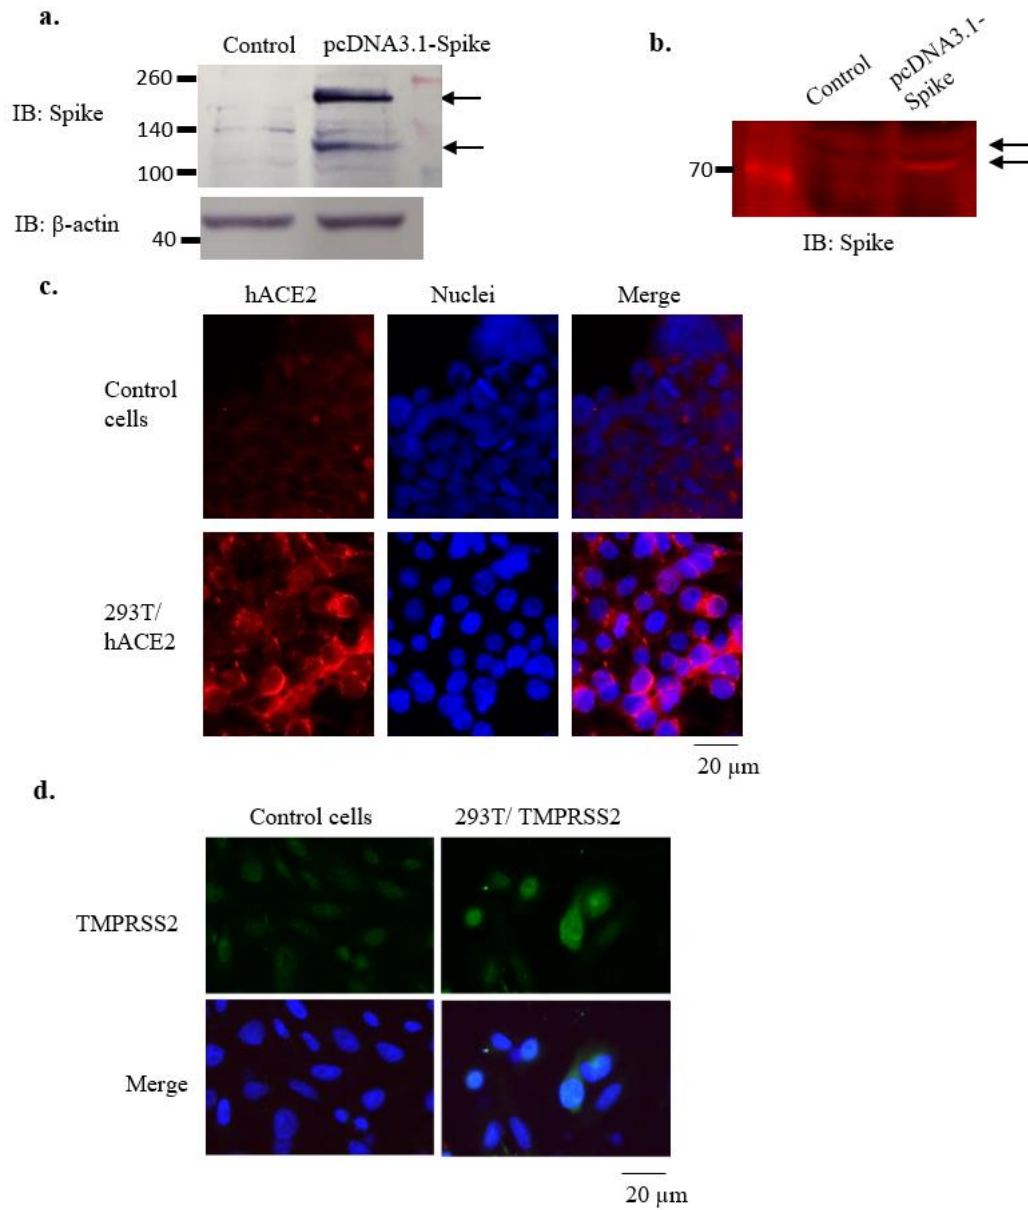

500

501 **Fig 2. Observation of spike, hACE2, and TMPRSS2 expression.** a. Detection of spike

502 expression in 293T cells transfected with spike plasmid. b. Detection of spike in the

503 conditioned medium, which represented SARS-CoV-2 PSV. c-d. Detection of hACE2 and

504 TMPRSS2 expression by immunofluorescence staining.

505

506

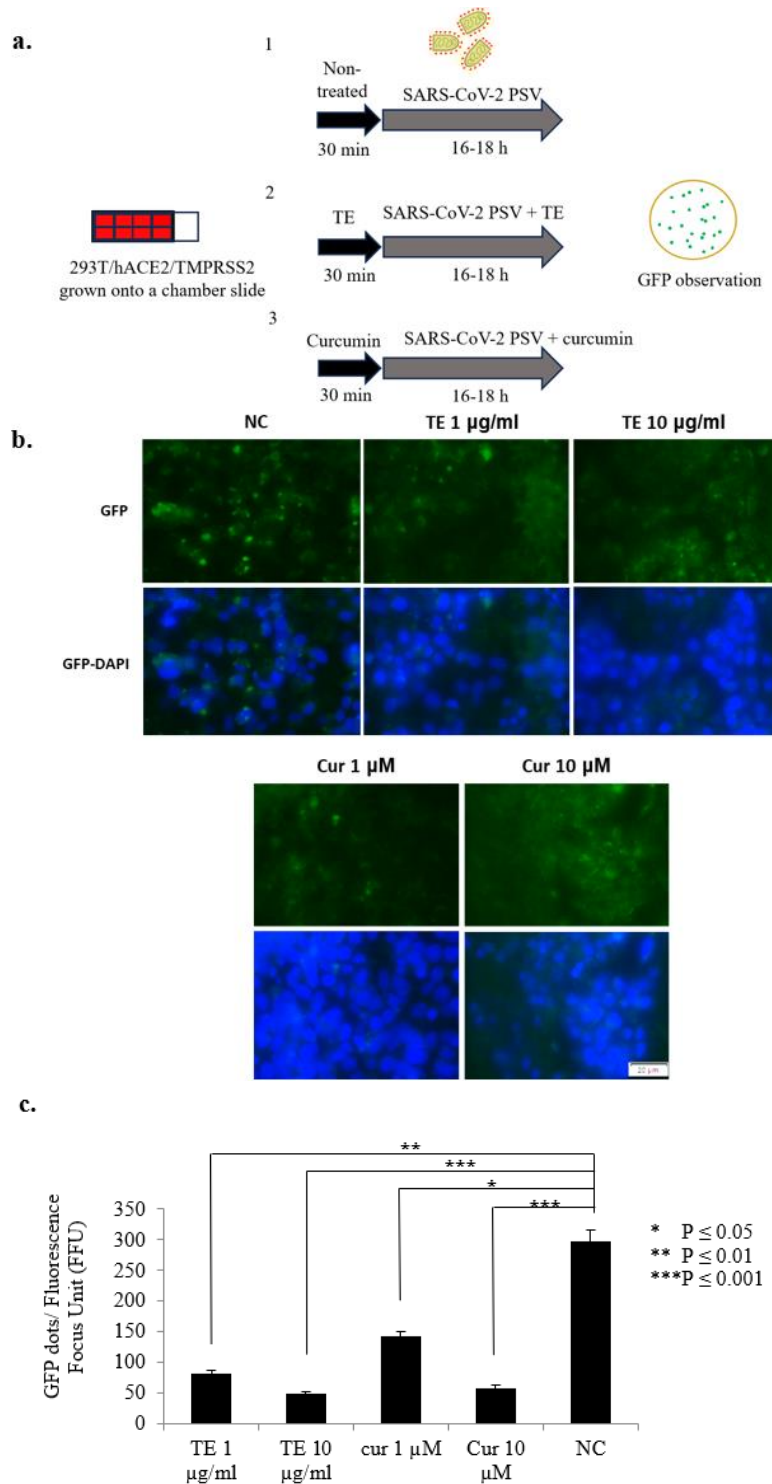

507

508

509 **Fig 3. Effect of turmeric extract and curcumin on PSV entry in 293T/hACE2/TMPRSS2**

510 **cells.** a. Schematic representation of PSV entry assay in 293T/hACE2/TMPRSS2 cells. b. The

511 representative image shows GFP dots to represent PSV internalization. c. Graph representing

512 quantification of GFP dots (n = 8 microscope fields). TE: turmeric extract; Cur: curcumin; NC:

513 nontreated cells.



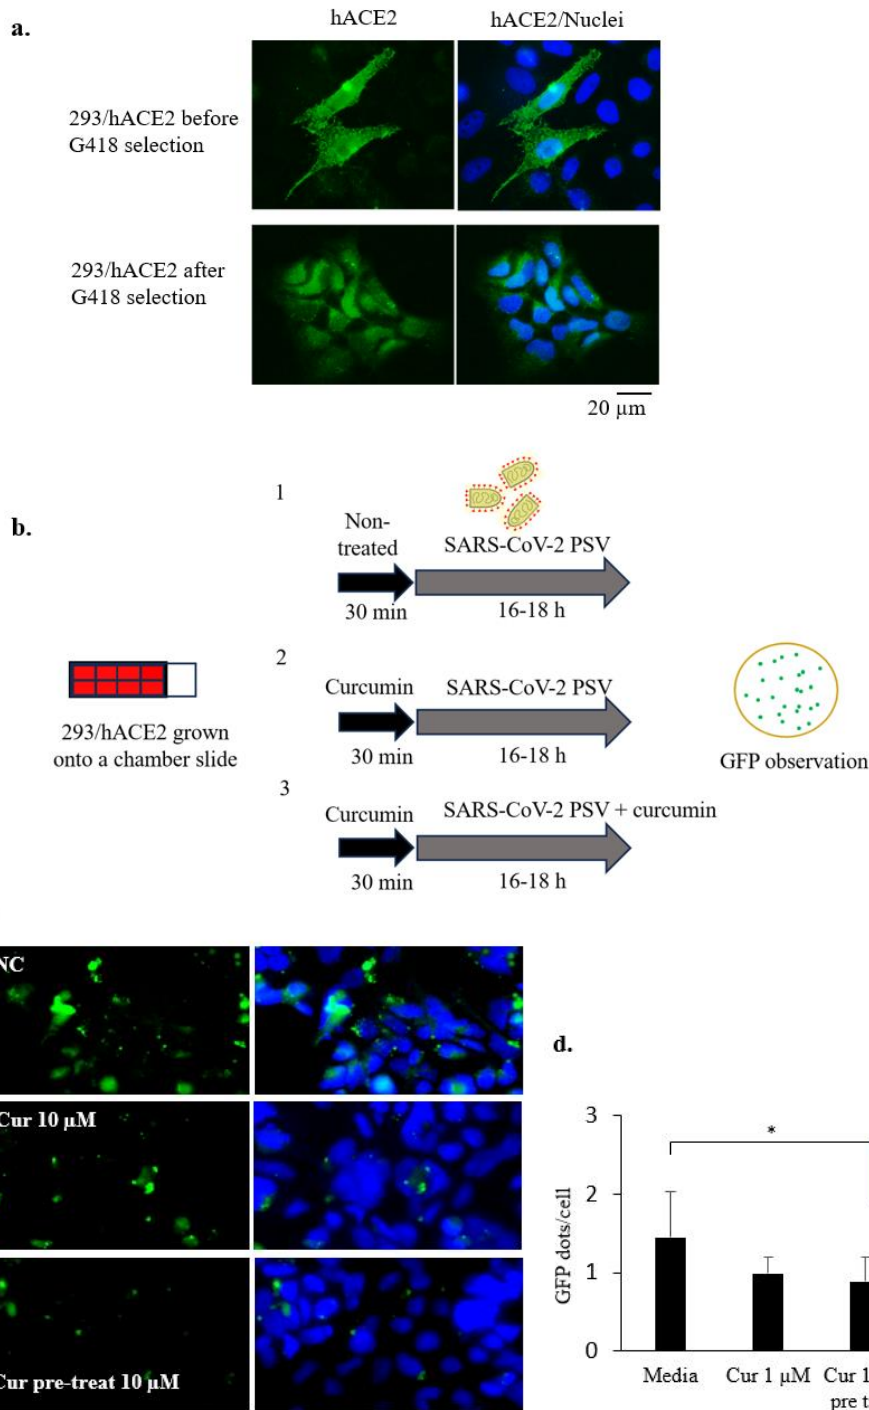

514

**c.**

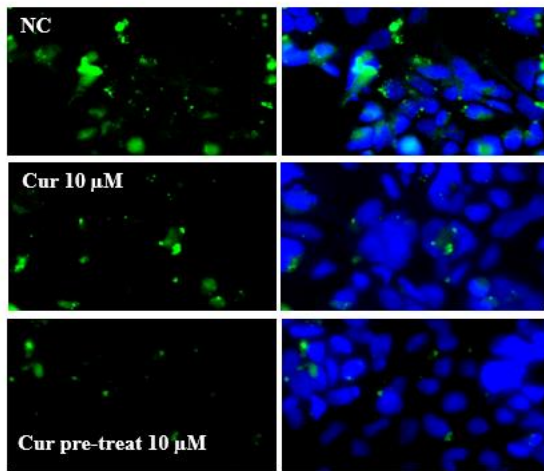

**d.**

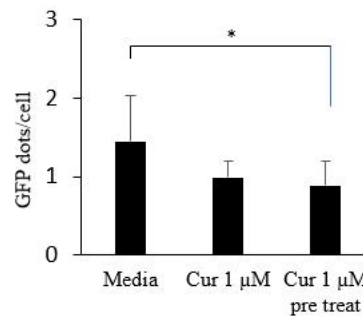

515

516 **Fig 4. Effect of curcumin on PSV entry in 293/ACE2 cells.** a. Observation of hACE2

517 expression in 293/hACE2 cells after transduction, before and after selection with antibiotic

518 G418. b. Schematic representation of PSV entry assay in 293/hACE2 stable cells. c. The

519 representative image shows GFP dots to represent PSV internalization. d. Graph representing

520 quantification of GFP dots (n = 5 microscope fields). P<0.05 = \*. NC: nontreated cells.

a.

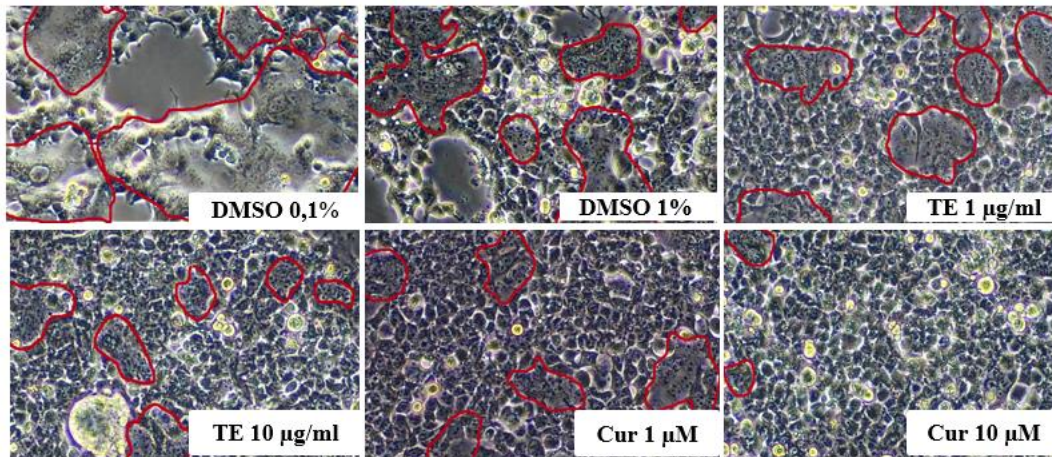

b.

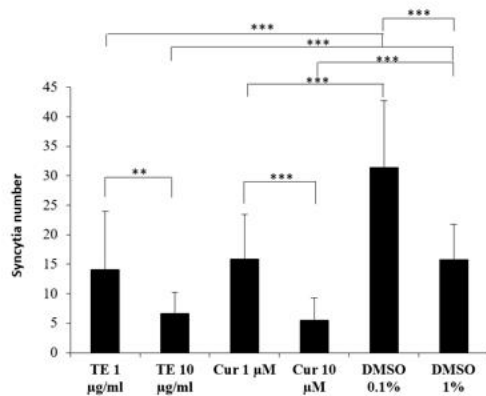

c.

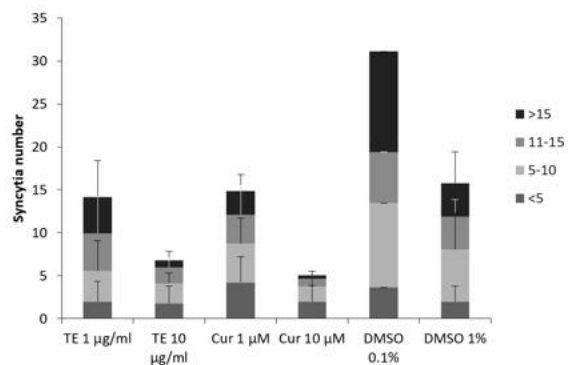

521

522 **Fig 5. Effect of curcumin and turmeric extract on syncytia formation.** a. Representative  
 523 image showing the syncytia formed after curcumin, TE, and DMSO treatment. b. Graph  
 524 representing quantification of syncytia number (n = 10 microscopic fields in duplicate). c.  
 525 Graph representing quantification of nuclei number per categories of syncytia (n = 10  
 526 microscopic fields). Red area: syncytia. P<0.05 = \*, P<0.01 = \*\*, P<0.001 = \*\*\*, ns = not  
 527 significant.

528

529

530

531 **Supplementary**

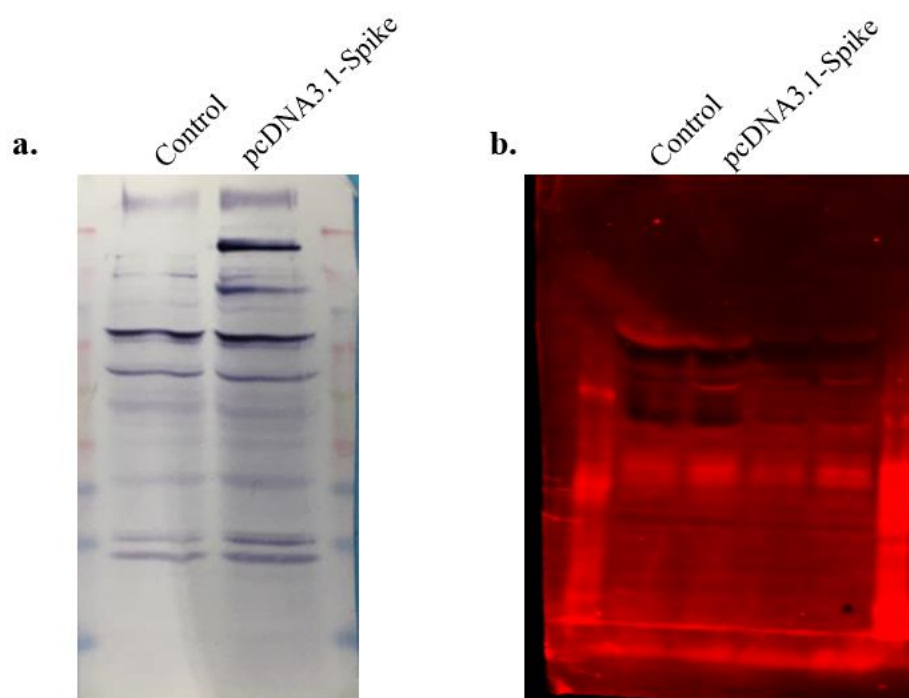

532

533 **Supplementary Figure 1.** Full membrane image of spike detection by western blot.

534

535
